# Supplementary material
Source: publisher figshare collection journal article supplement (https://acs.figshare.com/ndownloader/files/7597729)

# Supporting Information for

## Asymmetric Oxidation of a Dihydrothienopyrimidine

*Sonia Rodríguez,\* Nizar Haddad, Rogelio Frutos, Nelu Grinberg, Chris H. Senanayake*

Chemical Development US, Boehringer Ingelheim Pharmaceuticals, Inc.  
900 Ridgebury Rd., Ridgefield, CT 06877 (US)

E-mail: [sonia.rodriguez@boehringer-ingelheim.com](mailto:sonia.rodriguez@boehringer-ingelheim.com)

*\*Corresponding Author*

### Table of Contents

1. General
2. General experimental procedure for DOE studies
3. Data for DOE studies
4. NMR Spectra of (R)-4-chloro-2-(4-(4-chlorophenyl)piperazin-1-yl)-6,7-dihydrothieno[3,2-d]pyrimidine 5-oxide, 2

#### 1. General

Reagents were used as purchased without further purification. NMR spectra were recorded on a Bruker 400 MHz spectrometer. The chemical shift data are reported as  $\delta$  (ppm) downfield from tetramethylsilane which is used as an internal standard; coupling constants ( $J$ ) are reported in Hertz, and refer to apparent peak multiplicities. HPLC analysis was performed on an Agilent 1100 series using an Agilent XDB-C18 column; flow rate 2 mL/min; with a UV detection at 215 nm; mobile phase from 48% to 97% acetonitrile in water (0.1% HClO<sub>4</sub>) in 1.3 min, then hold to 97% for 1.2 min. Enantioselectivities were measured on an Agilent 1100 series using a chiralpak AD-H column; flow rate 1 mL/min; with a UV detection at 220 nm; mobile phase 20% isopropanol in heptane for 10 min.

## 2. General experimental procedure for DOE studies

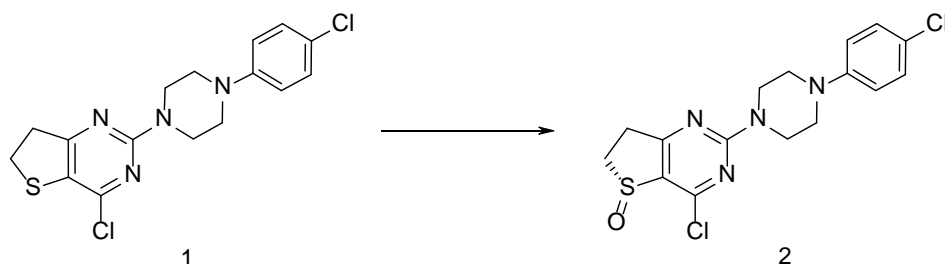

Titanium(IV) isopropoxide (5-20 mol%) was added to (*S,S*)-hydrobenzoin (10-40 mol%) in toluene at 23 °C followed by water (0-1.5 equiv). After stirring for certain time (0.5-2 h), the sulfide **1** (1.0 equiv) was added, and the reaction mixture was cooled to 0°C over 30 min before addition of *tert*-butyl hydroperoxide (2 equiv). After 24 h, the reaction mixture was quenched with 5% Na<sub>2</sub>SO<sub>3</sub> (5 mL) and extracted with dichloromethane (10 mL). The combined organic layers were washed with water (5 mL), dried (MgSO<sub>4</sub>) and concentrated. The crude reactions were analyzed by HPLC and NMR.

| Entry | Catalyst preparation time (h) | Catalyst loading (mol%) | Water (equiv) | Conversion (%) | ee (%) |
|-------|-------------------------------|-------------------------|---------------|----------------|--------|
| 1     | 0.5                           | 5                       | 0             | 97             | 88     |
| 2     | 2                             | 5                       | 0             | 90             | 94     |
| 3     | 0.5                           | 20                      | 0             | 88             | 95     |
| 4     | 2                             | 20                      | 0             | 93             | 94     |
| 5     | 0.5                           | 5                       | 1.5           | 89             | 90     |
| 6     | 2                             | 5                       | 1.5           | 90             | 92     |
| 7     | 0.5                           | 20                      | 1.5           | 95             | 97     |
| 8     | 2                             | 20                      | 1.5           | 90             | 64     |
| 9     | 1.25                          | 12.5                    | 0.78          | 92             | 82     |
| 10    | 0.5                           | 5                       | 1             | 88             | 93     |
| 11    | 0.5                           | 5                       | 1             | 95             | 89     |
| 12    | 0.5                           | 5                       | 1             | 92             | 90     |
| 13    | 0.5                           | 5                       | 1             | 90             | 91     |

## 3. NMR Spectra of (*R*)-4-chloro-2-(4-(4-chlorophenyl)piperazin-1-yl)-6,7-dihydrothieno[3,2-d]pyrimidine 5-oxide, **2**

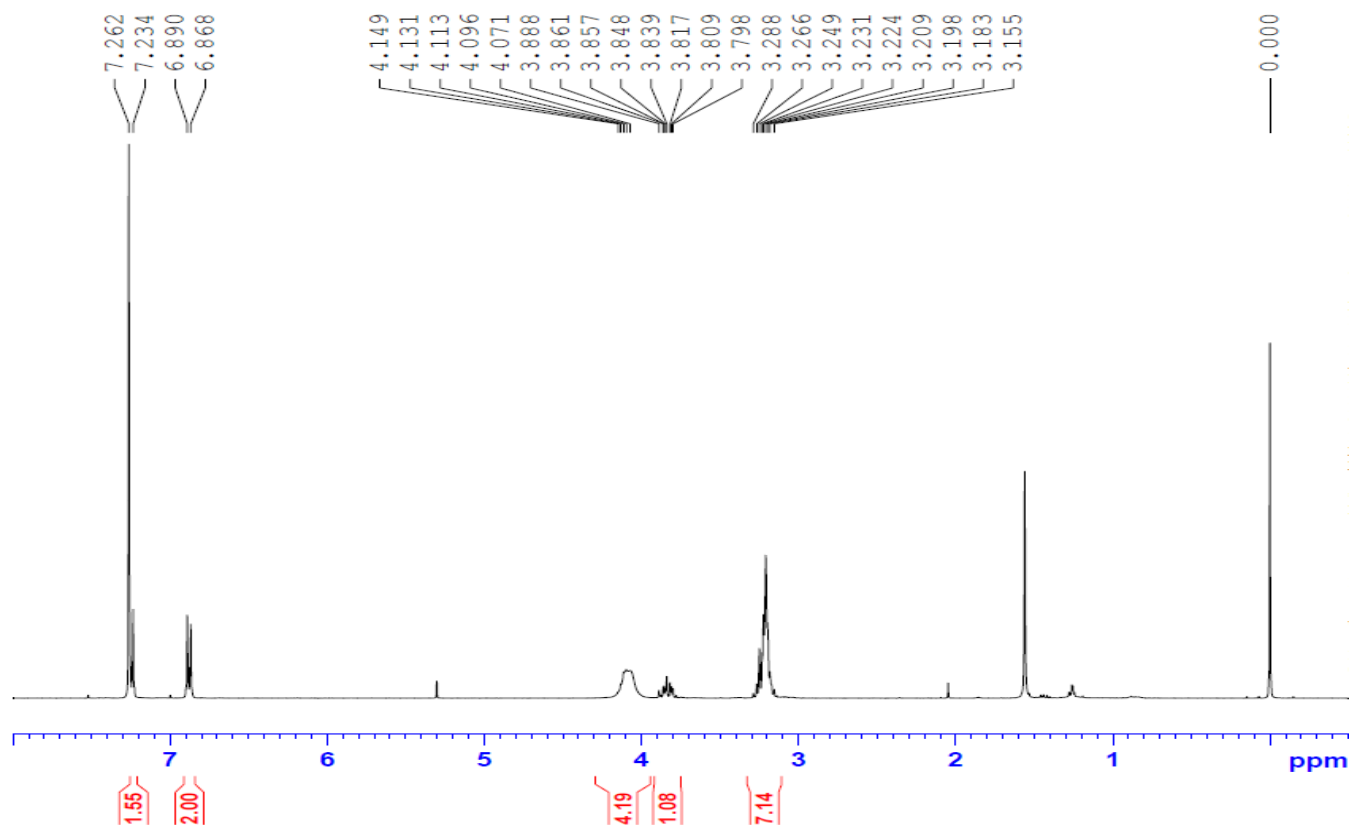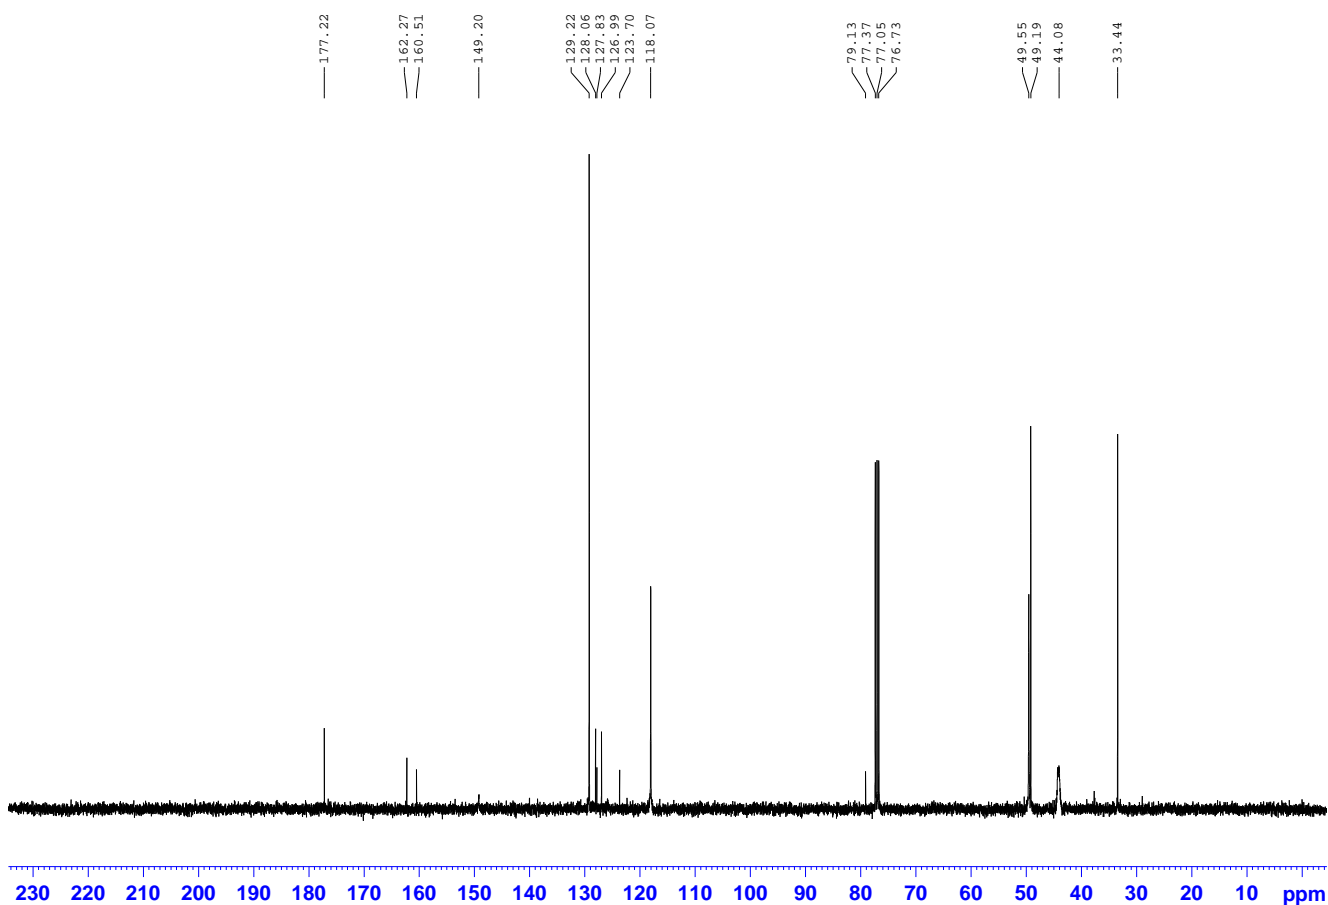

Supplement: Supplementary file 1 [file 7597729]
